# Supplementary material for: Tuning reactivity of Fischer–Tropsch synthesis by regulating TiOx overlayer over Ru/TiO2 nanocatalysts
Source: PubMed Central journal article supplement (PMC7314765; doi:10.1038/s41467-020-17044-4), 2020-06-24
Supplement: 41467_2020_17044_MOESM1_ESM.pdf [file 41467_2020_17044_MOESM1_ESM.pdf]

1

2

3

## **Supplementary Information**

4

5

6 **Tuning reactivity of Fischer–Tropsch synthesis by regulating TiO<sub>x</sub>**

7 **overlayer over Ru/TiO<sub>2</sub> nanocatalysts**

8

9 **Zhang et al.**

10

## Supplementary Information

### Tuning reactivity of Fischer–Tropsch synthesis by regulating TiO<sub>x</sub> overlayer over Ru/TiO<sub>2</sub> nanocatalysts

Yaru Zhang<sup>1,2</sup>, Xiaoli Yang<sup>1,2,4</sup>, Xiaofeng Yang<sup>1,\*</sup>, Hongmin Duan<sup>1</sup>, Haifeng Qi<sup>1,2</sup>,  
Yang Su<sup>1</sup>, Binglian Liang<sup>1</sup>, Huabing Tao<sup>3</sup>, Bin Liu<sup>3</sup>, De Chen<sup>4</sup>, Xiong Su<sup>1,\*</sup>, Yanqiang  
Huang<sup>1,\*</sup>, and Tao Zhang<sup>1</sup>

<sup>1</sup> State Key Laboratory of Catalysis, Dalian Institute of Chemical Physics, Chinese Academy of Sciences, Dalian 116023, China

<sup>2</sup> University of Chinese Academy of Sciences, Beijing 100049, China

<sup>3</sup> School of Chemical and Biomedical Engineering, Nanyang Technological University Singapore 637459, Singapore

<sup>4</sup> Department of Chemical Engineering, Norwegian University of Science and Technology, Trondheim 7494, Norway.

\*To whom correspondence should be addressed. E-mail: [yqhuang@dicp.ac.cn](mailto:yqhuang@dicp.ac.cn) (Y. Huang); [yangxf2003@dicp.ac.cn](mailto:yangxf2003@dicp.ac.cn) (X. Yang); [suxiong@dicp.ac.cn](mailto:suxiong@dicp.ac.cn) (X. Su).

## 31 **Supplementary Methods**

32 **Preparation of the Ru/Al<sub>2</sub>O<sub>3</sub>-450 catalyst.** The Ru/Al<sub>2</sub>O<sub>3</sub>-450 catalyst was prepared  
33 by an incipient wetness impregnation method. In a typical synthesis, 1.6 g of the  
34 aqueous RuCl<sub>3</sub>·3H<sub>2</sub>O solution was diluted with deionized water to give a homogenous  
35 Ru solution, with a near saturated water absorption capacity of the support.  
36 Subsequently, 2.0 g of Al<sub>2</sub>O<sub>3</sub> was added to the solution, followed by the  
37 ultrasonication for 30 min to ensure dispersion of the oxide. The suspension was  
38 allowed to stand overnight, followed by drying at 120 °C for 12 h. The resulting  
39 material, denoted as Ru/Al<sub>2</sub>O<sub>3</sub>-450, was reduced in a H<sub>2</sub> gas flow (20 mL min<sup>-1</sup>) at  
40 450 °C before catalytic performance tests.

41 **XRD.** Powder X-ray diffraction (XRD) data were acquired using a PANalytical  
42 X'Pert-Pro X-ray diffractometer with Cu K $\alpha$  radiation ( $\lambda = 0.1541$  nm), operated at 40  
43 kV and 40 mA. A continuous-scan mode was used to collect 2 $\theta$  data from 10° to 80°  
44 at a scan rate of 10° min<sup>-1</sup>.

45 **N<sub>2</sub> physisorption.** Nitrogen physisorption was performed with a Micromeritics ASAP  
46 2460 instrument at -196 °C. The samples were degassed in vacuum at 110 °C for 1 h,  
47 then 300 °C for 4 h before measurements. The specific surface areas (S<sub>BET</sub>) were  
48 calculated using the Brunauer-Emmett-Teller (BET) method over the relative pressure  
49 range of P/P<sub>0</sub> = 0.05–0.30. The pore volumes (V<sub>pore</sub>) were determined using the single  
50 point adsorption total pore volume of pores less than 40.3 nm in diameter at P/P<sub>0</sub> =  
51 0.95.

52 **HRSEM.** The morphology of each catalyst was characterized by high-resolution

53 scanning electron microscopy (HRSEM) using a field-emission JEOL JSM-7800F  
54 microscope operating at 3.0 kV.

55 **H<sub>2</sub>-TPR experiment.** H<sub>2</sub> temperature programmed reduction (H<sub>2</sub>-TPR) was  
56 performed with a Micromeritics AutoChem II 2920 apparatus. Prior to TPR  
57 measurements, the pristine Ru/TiO<sub>2</sub> sample was loaded into a quartz reactor and  
58 pretreated with Ar at 200 °C for 60 min. After the temperature decreasing to 50 °C, a  
59 10% H<sub>2</sub> in Ar flow was introduced into the reactor by heating the sample from 50 to  
60 800 °C at a heating rate of 10 °C min<sup>-1</sup>. The signal was recorded online with a thermal  
61 conductivity detector (TCD).

62 **Cu upd experiments.** The underpotential deposition of Cu (Cu upd) was employed to  
63 determine the exposure of surface metallic Ru on the Ru/TiO<sub>2-x</sub> catalysts. Copper is  
64 an ideal metal for upd on Ru because of the similarity of the atomic radii of the two  
65 metals—Cu, 0.128 nm; Ru, 0.134 nm. The specific surface area of Ru (i.e. S<sub>sp</sub> of Ru,  
66 m<sup>2</sup> g<sup>-1</sup>) can be calculated by the integration of the peak area corresponding to upd  
67 stripping. In this process, we assume that a single Cu atom deposits on one surface Ru  
68 to form a monolayer deposition, which can be realized by judicious choice of  
69 electrochemical potential and deposition time.

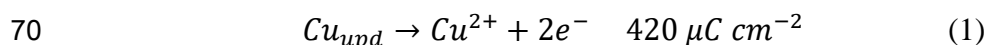

71 It is worth noting that only the Ru species in reduction state can act as deposition site  
72 for Cu upd. In contrast, the Ru species in oxidation state are inert site for Cu upd.  
73 Therefore, only the amount of surface metallic Ru can be acquired from Cu upd  
74 experiments, which in turn can provide the residual metallic Ru sites after covering by

75 TiO<sub>x</sub> overlayers. These analyses were carried out in a solution containing 0.1 mol L<sup>-1</sup>  
76 H<sub>2</sub>SO<sub>4</sub> and 0.002 mol L<sup>-1</sup> CuSO<sub>4</sub>. Electrodes were cleaned electrochemically then  
77 transferred into the solution containing dissolved cupric ions, after which they were  
78 polarized at 0.3 V for 100 s. A linear voltammetry scan was then performed from the  
79 admission potential to the point at which all the underpotential deposition Cu was  
80 oxidized, at a scan rate of 0.01 V s<sup>-1</sup>. The specific surface area of the metallic Ru was  
81 calculated using the equation

$$82 \quad S_{sp} = \frac{\text{Area of surface metallic Ru}}{\text{Mass of catalyst} \times \omega_{Ru}} \quad (2)$$

83 where the numerator was determined from the Cu upd data and  $\omega_{Ru}$ , the mass fraction  
84 of Ru, was determined by ICP-OES.

85 The dispersion of the metallic Ru,  $D$ , was determined by the equation

$$86 \quad D = S_{sp} \times \frac{M_{Ru}}{N_A \times a_m} \quad (3)$$

87 where  $M_{Ru}$  is the atomic mass of Ru (101.07 g mol<sup>-1</sup>),  $N_A$  is Avogadro's number (6.02  
88  $\times 10^{23}$  mol<sup>-1</sup>) and  $a_m$  is the area occupied by a surface atom (for Ru,  $a_m = 6.35 \text{ \AA}^2$ ).

89 **XPS measurements.** X-ray photoelectron spectroscopy (XPS) data were obtained  
90 using a Thermofisher ESCALAB 250Xi instrument, employing monochromated Al  
91 K $\alpha$  radiation ( $h\nu = 1486.6$  eV) as the X-ray source. The samples were pretreated at  
92 different temperatures in a H<sub>2</sub> flow and then held under an inert atmosphere, followed  
93 by rapid transfer to the sample chamber to minimize exposure to air. The results were  
94 calibrated by setting the C 1s adventitious carbon peak position to 284.6 eV.

95 **The calculation method for FTS catalytic performance.** The feed gas (H<sub>2</sub>/CO/Ar =  
96 64/32/4) and the gaseous products (including CO<sub>2</sub>, CH<sub>4</sub> and C<sub>2</sub>–C<sub>4</sub> hydrocarbons)

97 were analyzed online by gas chromatograph (GC), in which Ar was used as an internal  
98 standard to calculate the extent of CO conversion and product selectivity. The  
99 catalytic results were determined by the peak areas of the components identified by  
100 GC which was equipped with an HP-PLOT/Q capillary column connected to a flame  
101 ionization detector (FID) and a TDX-01 column connected to a thermal conductivity  
102 detector (TCD).

103 The thermal conductivity detector (TCD) was used to detect inorganic gaseous,  
104 including Ar, CO, CH<sub>4</sub> and CO<sub>2</sub>. The CO conversion, CH<sub>4</sub> selectivity and CO<sub>2</sub>  
105 selectivity can be determined by the peak areas of the components identified by TCD.

106 The CO conversion,  $X_{CO}$ , was calculated using the equation

$$107 \quad X_{CO} = \frac{n_{in}(CO) - n_{out}(CO)}{n_{in}(CO)} = 1 - \frac{A_{out}(CO)/A_{out}(Ar)}{A_{in}(CO)/A_{in}(Ar)} \quad (4)$$

108 where  $n_{in}(CO)$  and  $n_{out}(CO)$  refer to the mole number of CO at the inlet and outlet,  
109 respectively,  $A_{in}(CO)$  and  $A_{in}(Ar)$  refer to the chromatographic peak area of CO and Ar  
110 in the feed gas, and  $A_{out}(CO)$  and  $A_{out}(Ar)$  refer to the chromatographic peak area of  
111 CO and Ar in the off-gas.

112 The reaction rate was calculated as

$$113 \quad \text{Reaction rate} = \frac{GHSV \times X_{CO} \times CO \text{ concentration}}{22400 \times \omega_{Ru}} \quad (5)$$

114 where  $GHSV$  is the gas hourly space velocity and  $\omega_{Ru}$  is the mass fraction of Ru (2.2  
115 wt% detected by ICP-OES).

116 The turnover frequency (TOF) was determined using the equation

$$117 \quad \text{TOF} = \frac{\text{Reaction rate} \times M_{Ru}}{3600 \times Ru \text{ dispersion}} \quad (6)$$

118 where  $M_{Ru}$  is the atomic mass of Ru (101.07 g mol<sup>-1</sup>) and the Ru dispersion was

119 determined by the CO chemisorption results.

120 The selectivity values presented in this work were calculated on a carbon basis.

121 The selectivity of CO<sub>2</sub> was calculated as

$$122 \quad S_{CO_2} = \frac{n_{out}(CO_2)}{n_{in}(CO) - n_{out}(CO)} = \frac{f_{CO_2/Ar} [A_{out}(CO_2) / A_{out}(Ar)]}{f_{CO/Ar} [A_{in}(CO) / A_{in}(Ar) - A_{out}(CO) / A_{out}(Ar)]} \quad (7)$$

123 where  $f_{CO_2/Ar}$  is the relative correction factors of CO<sub>2</sub> to Ar, which was determined by  
124 the calibrating gas;  $A_{out}(CO_2)$  refers to the chromatographic peak area of CO<sub>2</sub> detected  
125 by TCD in the off-gas.

126 Similarly, the selectivity of CH<sub>4</sub> was calculated as

$$127 \quad S_{CH_4} = \frac{n_{out}(CH_4)}{n_{in}(CO) - n_{out}(CO)} = \frac{f_{CH_4/Ar} [A_{out}(CH_4) / A_{out}(Ar)]}{f_{CO/Ar} [A_{in}(CO) / A_{in}(Ar) - A_{out}(CO) / A_{out}(Ar)]} \quad (8)$$

128 where  $f_{CH_4/Ar}$  is the relative correction factors of CH<sub>4</sub> to Ar, which was determined by  
129 the calibrating gas;  $A_{out}(CH_4)$  refers to the chromatographic peak area of CH<sub>4</sub> detected  
130 by TCD in the off-gas.

131 The flame ionization detector (FID) were used to detect CH<sub>4</sub> and C<sub>2</sub>–C<sub>4</sub>  
132 hydrocarbons. The CH<sub>4</sub> selectivity was used as a bridge to calculate the selectivity of  
133 C<sub>2</sub>–C<sub>4</sub> hydrocarbons identified by FID.

134 The selectivity for C<sub>x</sub>H<sub>y</sub> (x = 2–4) hydrocarbons was calculated as

$$135 \quad S_{C_xH_y} = \frac{x \cdot n_{out}(C_xH_y)}{n_{in}(CO) - n_{out}(CO)} = x \cdot f_{C_xH_y/CH_4} \cdot \frac{A_{FID}(C_xH_y)}{A_{FID}(CH_4)} \cdot S_{CH_4} \quad (9)$$

136 where  $f_{C_xH_y/CH_4}$  is the relative correction factors of C<sub>x</sub>H<sub>y</sub> to CH<sub>4</sub>, which was  
137 determined by the calibrating gas;  $A_{FID}(CH_4)$  and  $A_{FID}(C_xH_y)$  refer to the  
138 chromatographic peak area of CH<sub>4</sub> and C<sub>x</sub>H<sub>y</sub> detected by FID in the off-gas,  $S_{CH_4}$  is  
139 the CH<sub>4</sub> selectivity calculated by TCD.

140 Carbon balances were all greater than 90% and the selectivity for C<sub>5+</sub> was

141 determined using the relationship

$$142 \quad S_{C_{5+}} = 100\% - S_{CO_2} - S_{C_1} - S_{C_2} - S_{C_3} - S_{C_4} \quad (10)$$

143

144 The carbon number distribution in C<sub>5+</sub> fraction, including liquid hydrocarbons and  
145 solid wax, was analyzed offline using an Agilent 7890 gas chromatograph equipped  
146 with an HP-5 capillary column connected to a flame ionization detector (FID). The  
147 liquid hydrocarbons were dissolved in ethanol, while the solid wax was dissolved in  
148 dodecane. The relative content of each peak was detected by the normalization  
149 method of peak area.

150 **DFT calculations.** The relative stability of different TiO<sub>x</sub> (x = 1–4) clusters on the  
151 Ru(001) surface under different reduction degree conditions which can be represented  
152 as the variation of chemical potential of oxygen, was calculated according to the  
153 procedure of previous research<sup>1</sup>.

154 Considering a successive reduction of TiO<sub>4</sub>/Ru(001) to TiO<sub>2</sub>/Ru(001), the energy of  
155 removing an oxygen ( $\Delta E_r$ ) on TiO<sub>x</sub>/Ru(001) can be expressed as

$$156 \quad \Delta E_r = E(TiO_{x-1}) + \mu_o - E(TiO_x) \quad (11)$$

157 Here, the chemical potential of O atom ( $\mu_o$ ) is restrained between

$$158 \quad \mu_{o2} + 1/2 H_f(TiO_2) < \mu_o < \mu_{o2} \quad (12)$$

$$159 \quad \mu_{o2} = 1/2 E(O_2) \quad (13)$$

160 due to the limitation of the non-condensed condition of Ti metal and O<sub>2</sub> solid on our  
161 Ru/TiO<sub>x</sub> catalysts, which corresponds to the O-poor and O-rich conditions,  
162 respectively.  $\mu_{o2}$  refers to the chemical potential of gaseous O<sub>2</sub>.  $E(O_2)$  is the total



163 energy of a free O<sub>2</sub> molecule, and the data of the formation energy of rutile TiO<sub>2</sub>  
164 ( $H_f(\text{TiO}_2)$ ) was acquired from the reference ( $-10.30 \text{ eV}$ )<sup>2</sup>.

165 The relativistic DFT calculations were performed using the VASP code (a version  
166 of 5.4.4). The Perdew-Burke-Ernzerhof (PBE) exchange-correlation functional was  
167 used. The core and valence electrons were represented by the projector augmented  
168 wave (PAW) potential, and the plane wave basis set with a cut-off energy of 500 eV  
169 was used. The core and valence electrons were represented by the projector  
170 augmented wave potential updated in 2012 (potpaw\_PBE.5.2), which has been proved  
171 to acquire a reliable chemical accuracy in solid calculations<sup>3</sup>. The valence electrons  
172 were designated of Ti ( $3d^34s^1$ ), O ( $2s^22p^4$ ), Ru ( $4d^75s^1$ ), and C ( $2s^22p^2$ ) for the initial  
173 geometry searching and transition state locating. Optimized geometries were obtained  
174 by minimizing the forces on the atoms below  $0.02 \text{ eV \AA}^{-1}$ . The transition state was  
175 first isolated using the climbing image nudged elastic band (CI-NEB) method and  
176 then refined using the dimer method to until force is below  $0.02 \text{ eV \AA}^{-1}$ . The resulting  
177 transition state was finally confirmed by the normal mode frequency analysis,  
178 showing only one imaginary mode. The PBE type of PAW potential was displayed in  
179 Supplementary Figure 19. After that, the newly developed GW potential in  
180 potpaw\_PBE.5.2, with the valence electronic configuration of Ti ( $3s^23p^63d^4$ ), O  
181 ( $2s^22p^4$ ), Ru ( $4s^24p^64d^8$ ), and C ( $2s^22p^2$ ) was adopted for the further optimization of  
182 adsorption geometries and transition states.

183

184 **Supplementary Figures**

185

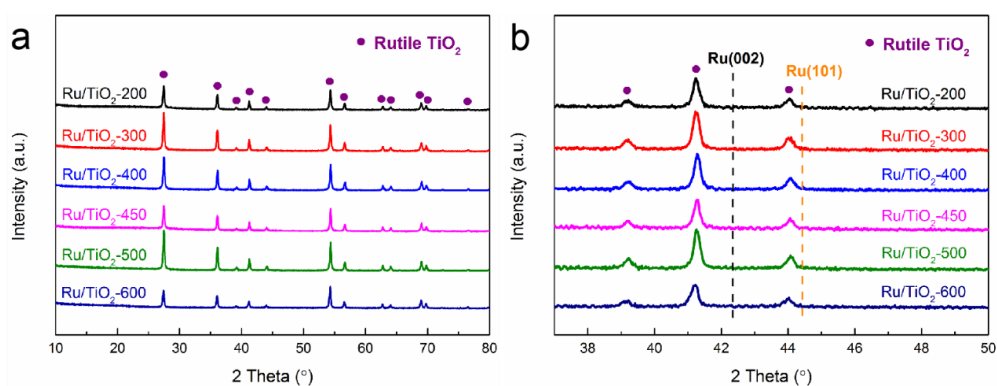

186

187 **Supplementary Figure 1.** (a) XRD patterns of the Ru/TiO<sub>2</sub> catalysts pretreated at  
188 different temperatures (Ru/TiO<sub>2</sub>-x samples) and (b) partially enlarged details.

189

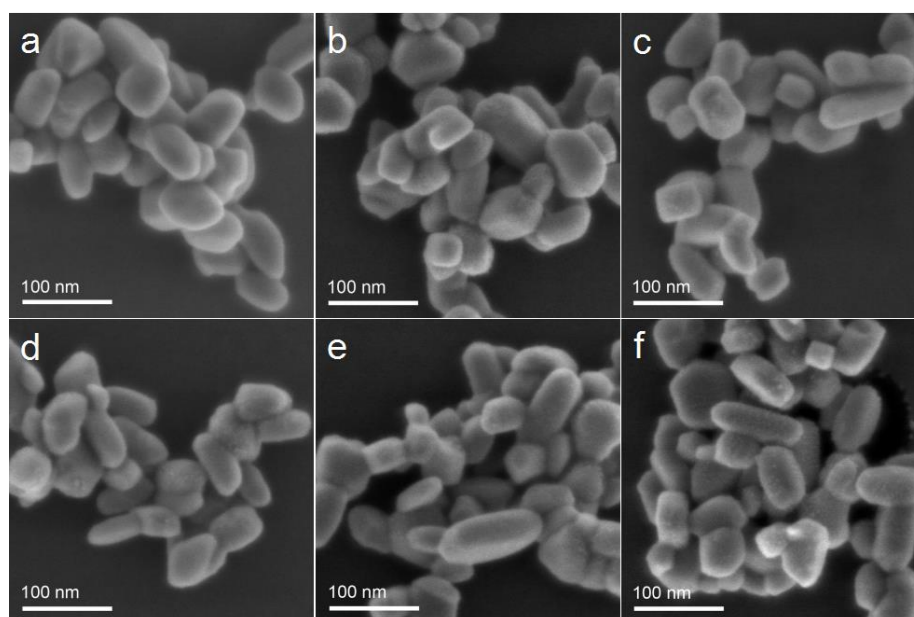

190

191 **Supplementary Figure 2.** HRSEM images of the Ru/TiO<sub>2</sub>-x catalysts: (a)  
192 Ru/TiO<sub>2</sub>-200; (b) Ru/TiO<sub>2</sub>-300; (c) Ru/TiO<sub>2</sub>-400; (d) Ru/TiO<sub>2</sub>-450; (e) Ru/TiO<sub>2</sub>-500;  
193 (f) Ru/TiO<sub>2</sub>-600.

194

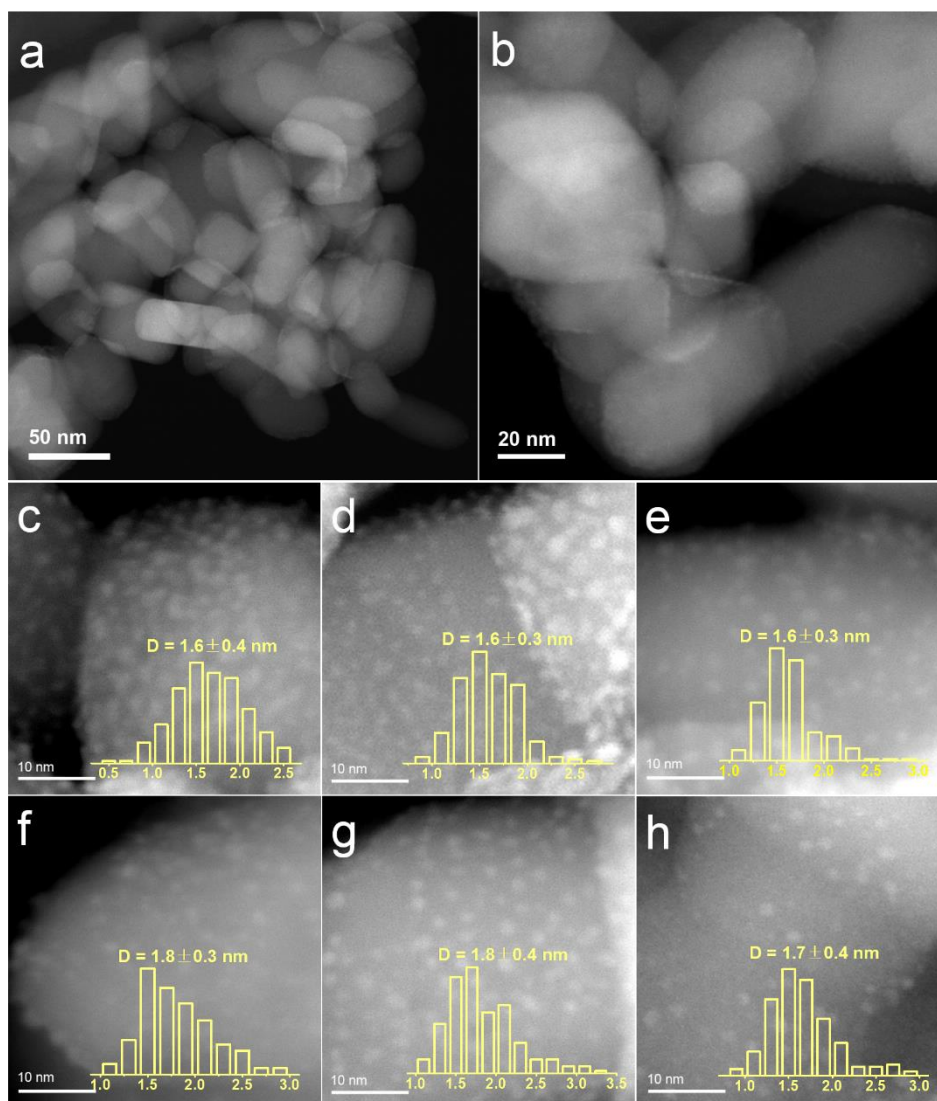

195

196 **Supplementary Figure 3.** (a, b) Low resolution HAADF-STEM images of the fresh

197 Ru/TiO<sub>2</sub> catalyst. (c–h) HAADF-STEM images of the Ru/TiO<sub>2</sub> catalysts pretreated at

198 different temperatures (Ru/TiO<sub>2-x</sub> samples) with the metal size distribution. (c)

199 Ru/TiO<sub>2</sub>-200; (d) Ru/TiO<sub>2</sub>-300; (e) Ru/TiO<sub>2</sub>-400; (f) Ru/TiO<sub>2</sub>-450; (g) Ru/TiO<sub>2</sub>-500;

200 (h) Ru/TiO<sub>2</sub>-600.

201

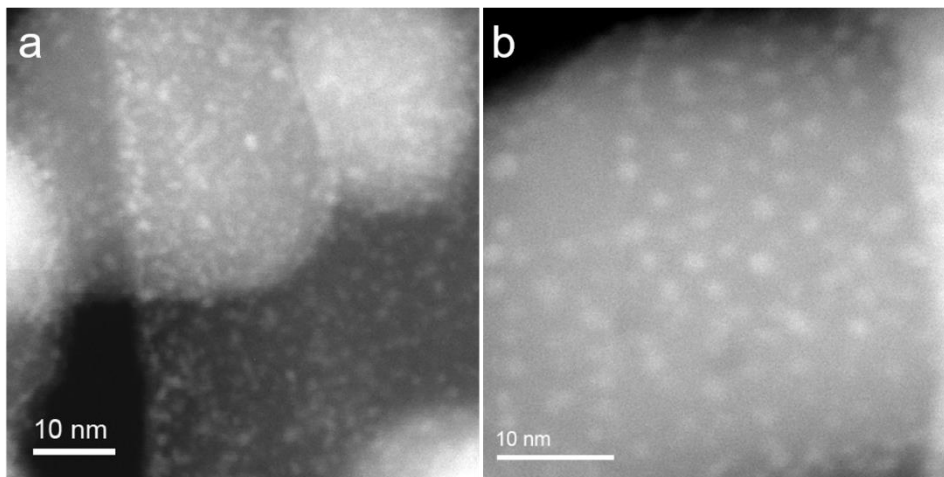

202

203 **Supplementary Figure 4.** HAADF-STEM images of Ru/TiO<sub>2</sub> samples upon different

204 steps. (a) Fresh RuCl<sub>3</sub>/TiO<sub>2</sub> catalyst after impregnation and drying overnight. (b) The

205 obtained Ru/TiO<sub>2</sub>-500 catalyst after thermal treatment in air at 300 °C followed by

206 reduction in H<sub>2</sub> at 500 °C.

207

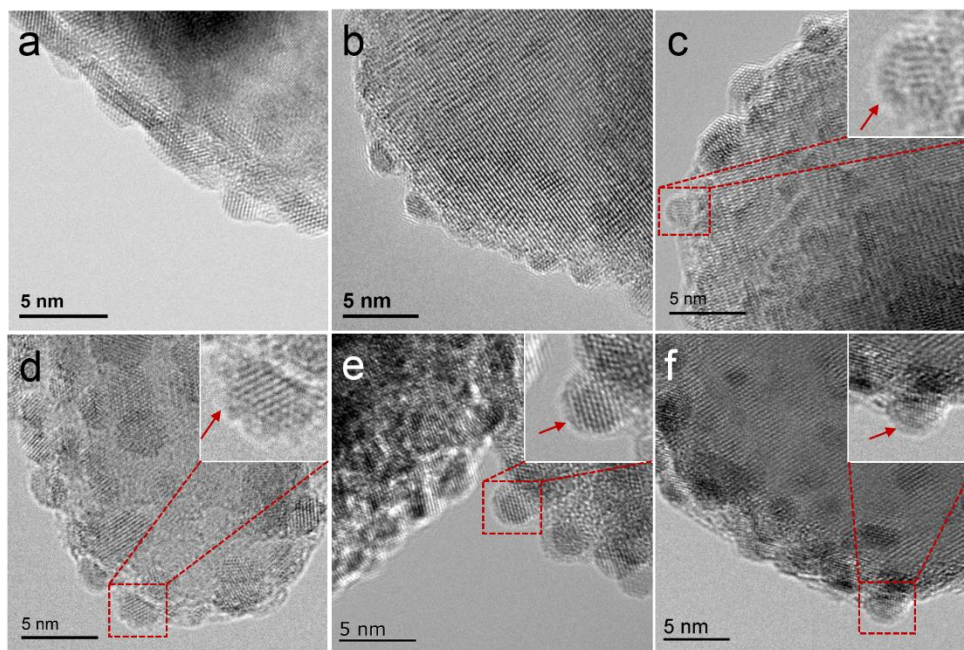

208

209 **Supplementary Figure 5.** HRTEM images of the Ru/TiO<sub>2</sub> catalysts pretreated at  
210 different temperatures (Ru/TiO<sub>2-x</sub> samples). (a) Ru/TiO<sub>2</sub>-200; (b) Ru/TiO<sub>2</sub>-300; (c)  
211 Ru/TiO<sub>2</sub>-400; (d) Ru/TiO<sub>2</sub>-450; (e) Ru/TiO<sub>2</sub>-500; (f) Ru/TiO<sub>2</sub>-600.

212

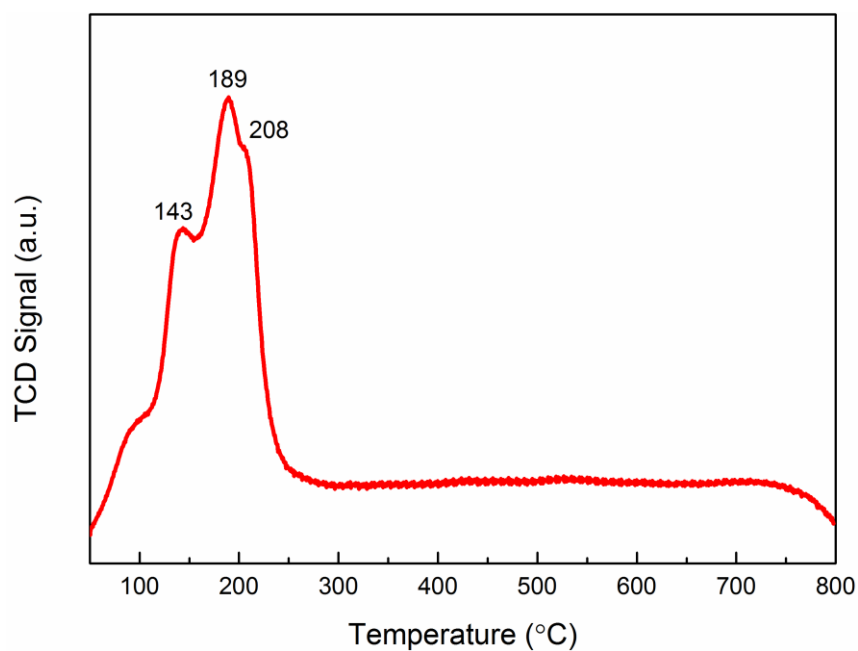

213

214 **Supplementary Figure 6.** H<sub>2</sub>-TPR profile obtained from the fresh Ru/TiO<sub>2</sub> catalyst.

215

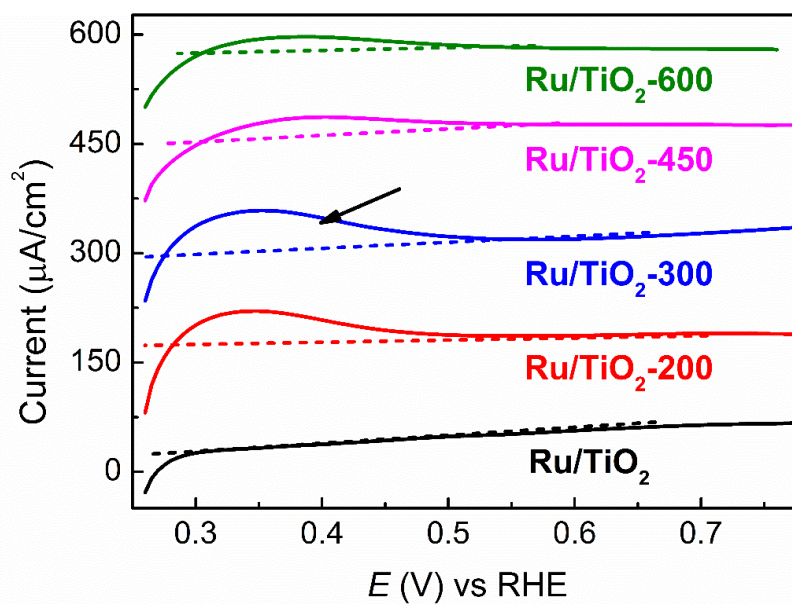

216

217 **Supplementary Figure 7.** Underpotential deposition of copper (Cu upd) on the fresh

218 Ru/TiO<sub>2</sub> catalyst and the Ru/TiO<sub>2</sub>-*x* catalysts.

219

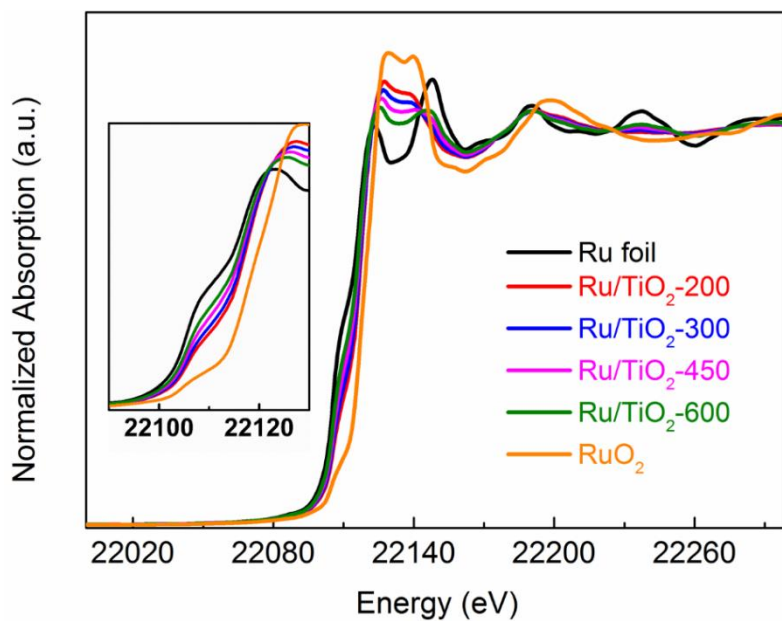

220

221 **Supplementary Figure 8.** Normalized XANES spectra at the Ru *K*-edge for the

222 Ru/TiO<sub>2</sub>-*x* catalysts.

223



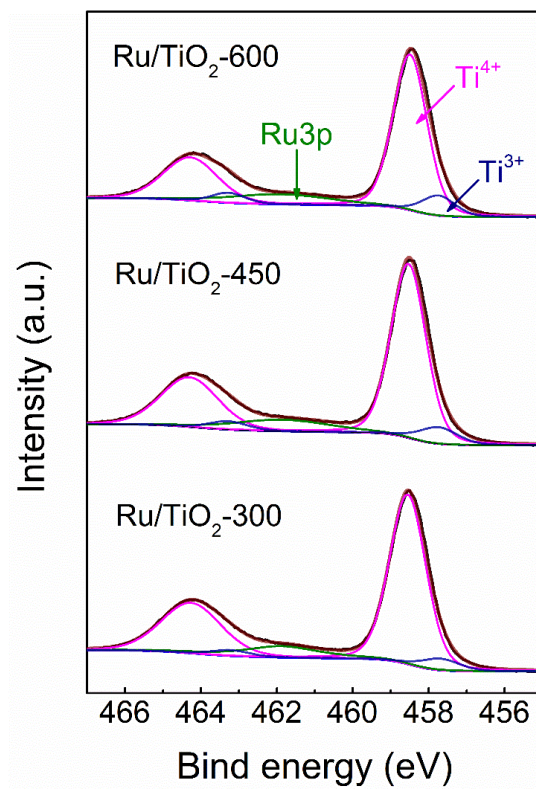

224

225 **Supplementary Figure 9.** Ti 2p and Ru 3p<sub>3/2</sub> XP spectra of the Ru/TiO<sub>2-x</sub> catalysts.

226



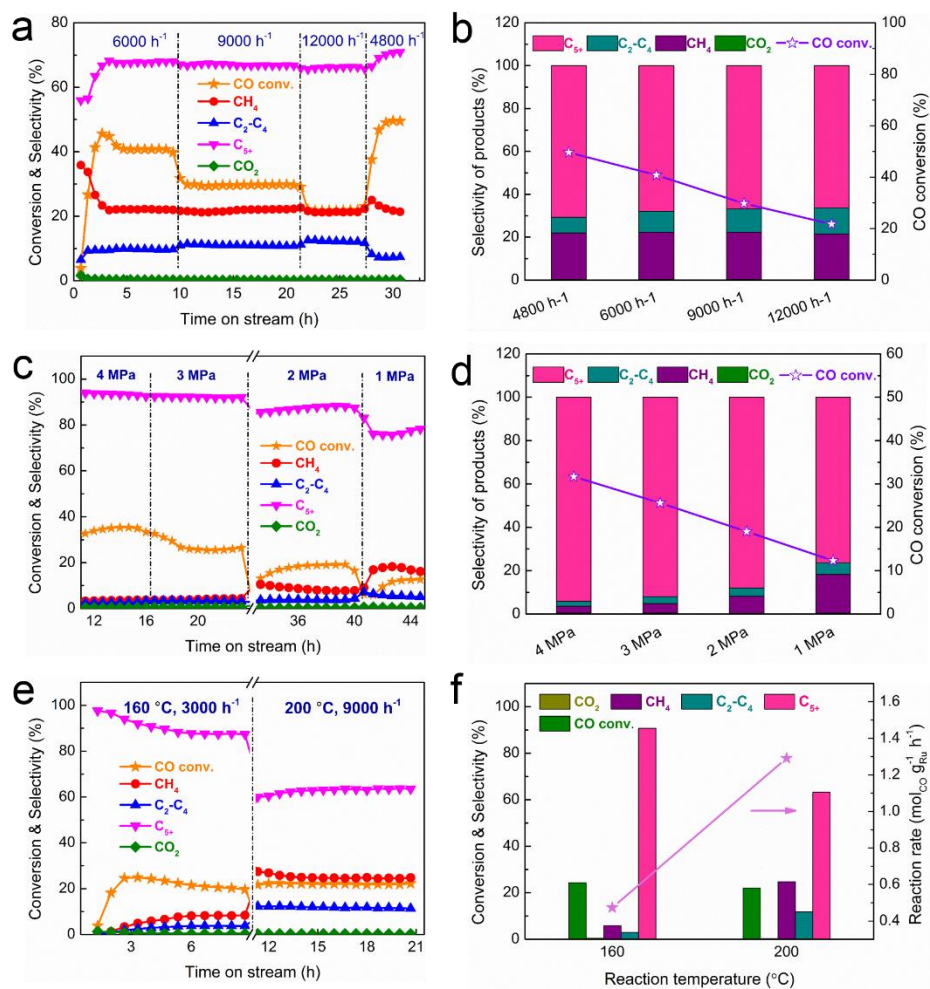

227

228 **Supplementary Figure 10.** (a, b) The effect of the space velocity over the

229 Ru/TiO<sub>2</sub>-450 catalyst (reaction conditions: 200 °C, 2 MPa, H<sub>2</sub>/CO/Ar = 64/32/4). (c, d)

230 The effect of reaction pressure over the Ru/TiO<sub>2</sub>-450 catalyst (reaction conditions:

231 160 °C, space velocity = 3000 mL h<sup>-1</sup> g<sub>cat</sub><sup>-1</sup>, H<sub>2</sub>/CO/Ar = 64/32/4). (e, f) The effect of

232 reaction temperature over the Ru/TiO<sub>2</sub>-450 catalyst (reaction conditions: 2 MPa, space

233 velocity = 3000 mL h<sup>-1</sup> g<sub>cat</sub><sup>-1</sup> for 160 °C and 9000 mL h<sup>-1</sup> g<sub>cat</sub><sup>-1</sup> for 200 °C, H<sub>2</sub>/CO/Ar

234 = 64/32/4).

235

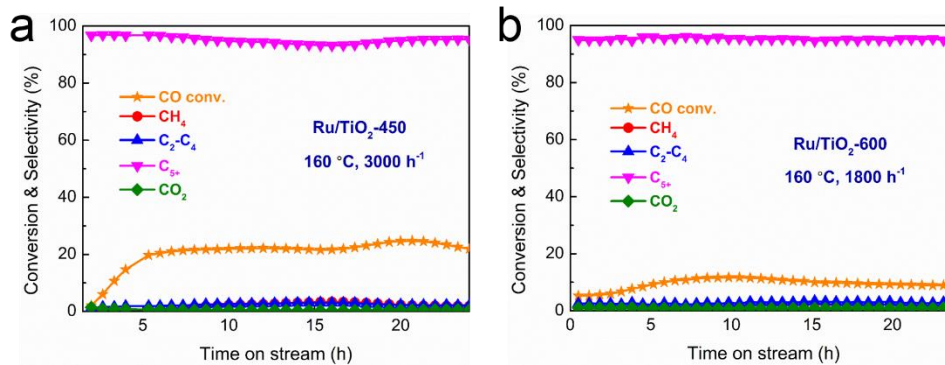

236

237 **Supplementary Figure 11.** Evolution of catalytic performance versus time over the

238 (a) Ru/TiO<sub>2</sub>-450, (b) Ru/TiO<sub>2</sub>-600 catalyst.

239

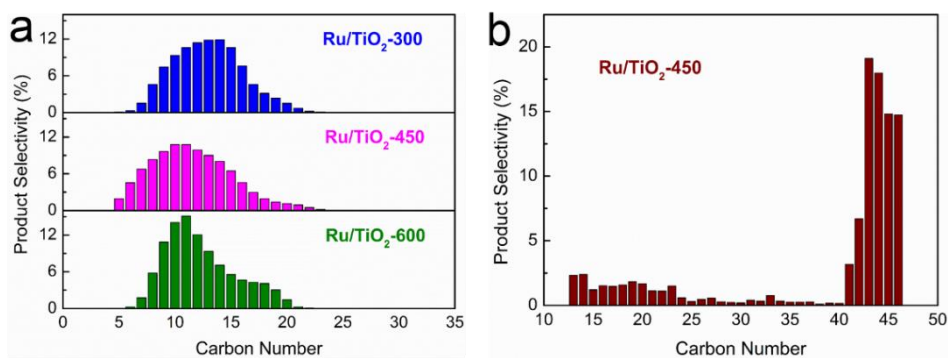

240

241 **Supplementary Figure 12.** The carbon number distribution (a) Liquid hydrocarbons;

242 (b) Solid wax.

243

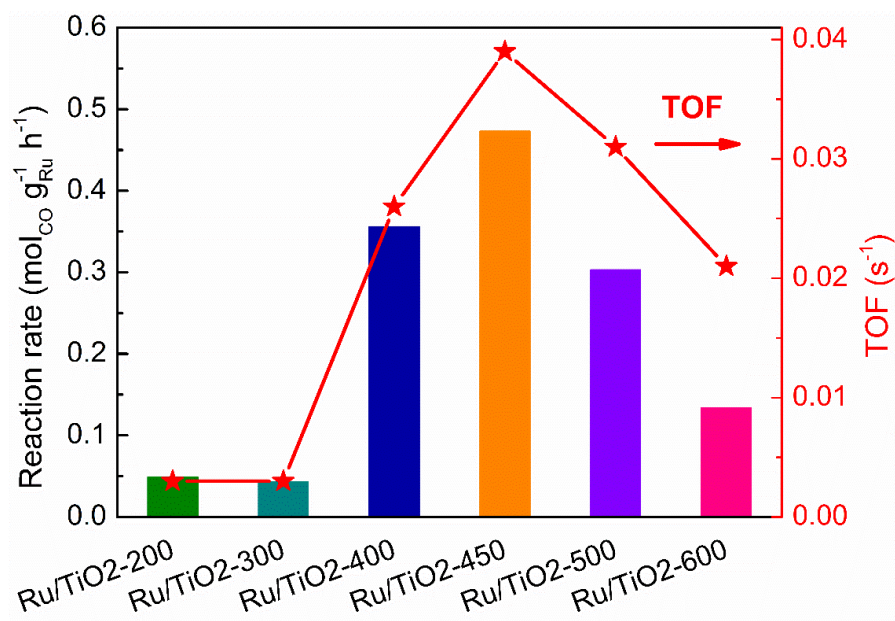

244

245 **Supplementary Figure 13.** Reaction rates and TOF values for the Ru/TiO<sub>2-x</sub>

246 catalysts.

247

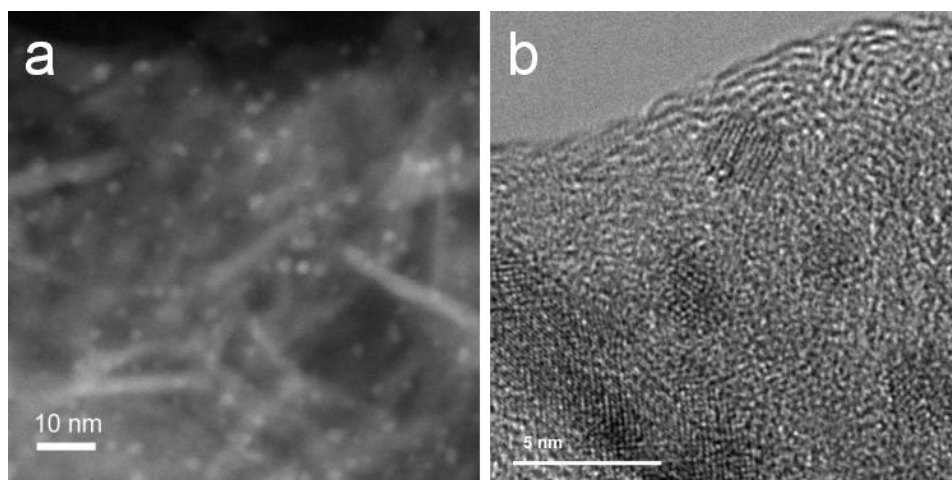

248

249 **Supplementary Figure 14.** (a) HAADF-STEM and (b) HRTEM images of the spent

250 Ru/Al<sub>2</sub>O<sub>3</sub>-450 catalyst.

251

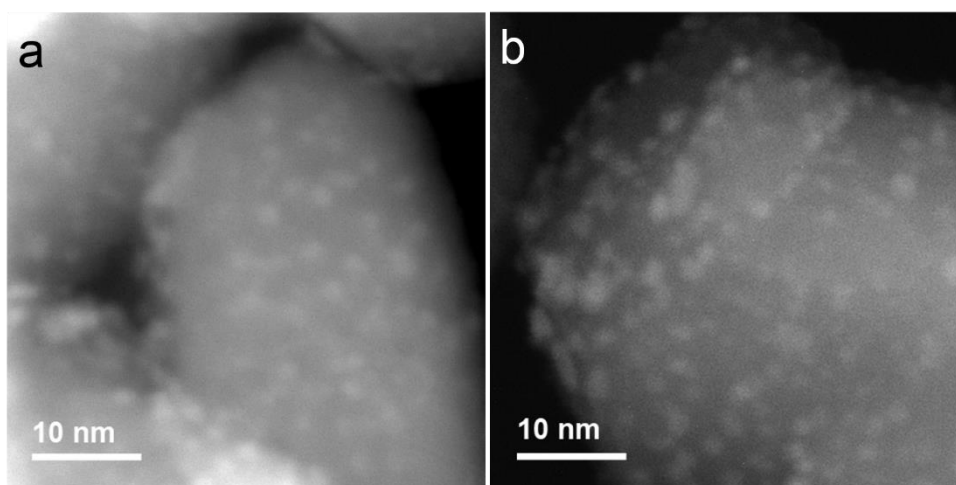

252

253 **Supplementary Figure 15.** HAADF-STEM images of (a) the fresh Ru/TiO<sub>2</sub>-450 and

254 (b) Ru/TiO<sub>2</sub>-450-spent catalyst.

255

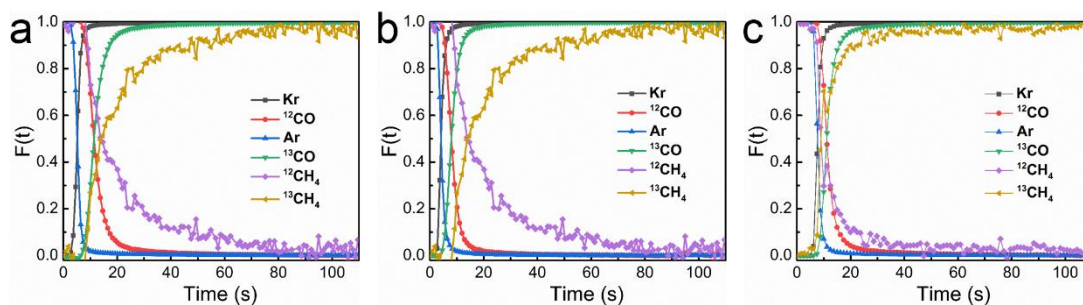

256

257 **Supplementary Figure 16.** Normalized transient curves for the Ru/TiO<sub>2-x</sub> catalysts  
 258 after a switch from <sup>12</sup>CO/H<sub>2</sub>/Ar to <sup>13</sup>CO/H<sub>2</sub>/Kr (SSITKA performing condition: 200 °C,  
 259 0.185 MPa, H<sub>2</sub>/CO = 10). (a) Ru/TiO<sub>2</sub>-300; (b) Ru/TiO<sub>2</sub>-450; (c) Ru/TiO<sub>2</sub>-600. F(t) is  
 260 the normalized transient response.

261

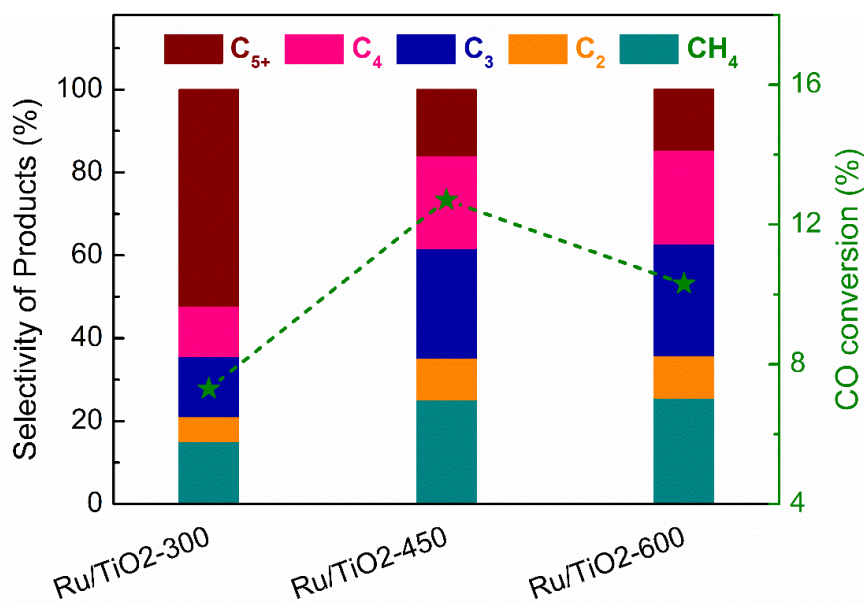

262

263 **Supplementary Figure 17.** Catalytic Performance of the Ru/TiO<sub>2-x</sub> catalysts in  
 264 SSITKA experiments. Performing condition: 200 °C, 0.185 MPa, H<sub>2</sub>/CO = 10.

265



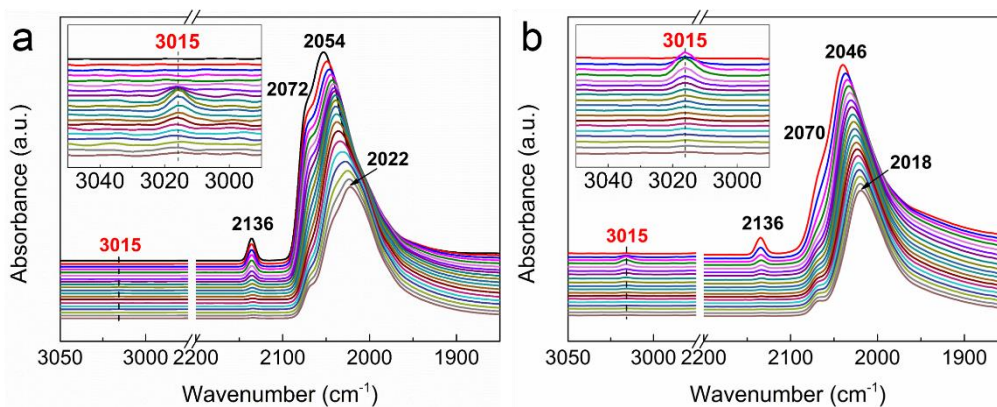

266

267 **Supplementary Figure 18.** Evolution of the  $\text{CO}_{\text{ad}}$  species during  $\text{H}_2$  flow at  $160\text{ }^\circ\text{C}$   
 268 as determined using *in situ* DRIFT spectra, over the  $\text{Ru}/\text{TiO}_2\text{-300}$  and  $\text{Ru}/\text{TiO}_2\text{-600}$   
 269 catalyst, with partially enlarged details in their panels.

270

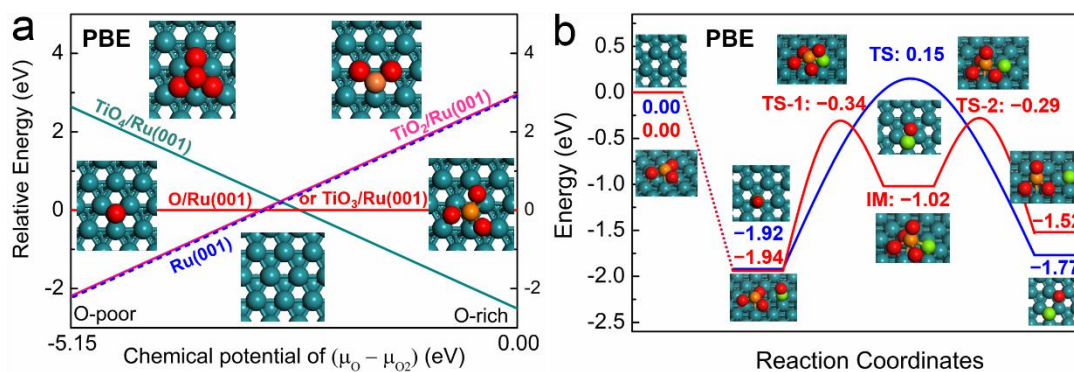

271

272 **Supplementary Figure 19.** (a) Thermodynamic stability of different  $\text{TiO}_x/\text{Ru}(001)$   
 273 and  $\text{O}/\text{Ru}(001)$  under a variation of the chemical potential of O, with referring to  
 274  $\text{TiO}_3/\text{Ru}(001)$  and  $\text{Ru}(001)$ , respectively, with the atomic configuration in insets. (b)  
 275 A possible catalytic mechanisms of CO activation at PBE level calculations.

276

277 **Supplementary Tables**

278

279 **Supplementary Table 1.** BET surface areas and pore volumes of the Ru/TiO<sub>2-x</sub>  
280 catalysts.

| Sample                   | S <sub>BET</sub> (m <sup>2</sup> g <sup>-1</sup> ) | V <sub>pore</sub> (cm <sup>3</sup> g <sup>-1</sup> ) |
|--------------------------|----------------------------------------------------|------------------------------------------------------|
| Ru/TiO <sub>2</sub> -200 | 36                                                 | 0.060                                                |
| Ru/TiO <sub>2</sub> -300 | 33                                                 | 0.054                                                |
| Ru/TiO <sub>2</sub> -400 | 39                                                 | 0.069                                                |
| Ru/TiO <sub>2</sub> -450 | 37                                                 | 0.075                                                |
| Ru/TiO <sub>2</sub> -500 | 37                                                 | 0.066                                                |
| Ru/TiO <sub>2</sub> -600 | 37                                                 | 0.065                                                |

281

282 **Supplementary Table 2.** The crystal parameters of rutile-type RuO<sub>2</sub> and TiO<sub>2</sub>.

| Oxide            | Crystal form | M–O bond distance<br>(nm) | Lattice spacing (nm) |        |
|------------------|--------------|---------------------------|----------------------|--------|
|                  |              |                           | a, b axis            | c axis |
| RuO <sub>2</sub> | rutile       | 0.1941                    | 0.4497               | 0.3105 |
| TiO <sub>2</sub> | rutile       | 0.1980                    | 0.4594               | 0.2958 |

283

284

285 **Supplementary Table 3.** The results obtained by underpotential deposition of copper

286 (Cu upd).

| Catalyst                 | A (cm <sup>2</sup> ) | S <sub>sp</sub> (m <sup>2</sup> g <sup>-1</sup> ) | Dispersion (%) |
|--------------------------|----------------------|---------------------------------------------------|----------------|
| Ru/TiO <sub>2</sub>      | 0                    | –                                                 | –              |
| Ru/TiO <sub>2</sub> -200 | 0.300                | –                                                 | –              |
| Ru/TiO <sub>2</sub> -300 | 0.405                | 30.7                                              | 8.1            |
| Ru/TiO <sub>2</sub> -450 | 0.202                | 15.3                                              | 4.0            |
| Ru/TiO <sub>2</sub> -600 | 0.189                | 14.2                                              | 3.8            |

287

288



289 **Supplementary Table 4.** EXAFS fitting results for the Ru/TiO<sub>2-x</sub> catalysts.<sup>[a]</sup>

| Sample                   | Shell | CN  | R<br>(Å) | $\sigma^2 \times 10^2$<br>(Å <sup>2</sup> ) | $\Delta E_0$<br>(eV) | R factor |
|--------------------------|-------|-----|----------|---------------------------------------------|----------------------|----------|
| Ru foil                  | Ru–Ru | 12  | 2.68     | 0.35                                        | 4.3                  | 0.013    |
| RuO <sub>2</sub>         | Ru–O  | 6   | 1.97     | 0.26                                        | 4.4                  | 0.005    |
| Ru/TiO <sub>2</sub> -200 | Ru–Ru | 2.2 | 2.67     | 0.77                                        | 5.3                  | 0.005    |
|                          | Ru–O  | 4.0 | 1.98     | 0.71                                        |                      |          |
| Ru/TiO <sub>2</sub> -300 | Ru–Ru | 3.2 | 2.67     | 0.71                                        | 5.8                  | 0.008    |
|                          | Ru–O  | 3.8 | 1.98     | 0.80                                        |                      |          |
| Ru/TiO <sub>2</sub> -450 | Ru–Ru | 4.2 | 2.67     | 0.58                                        | 3.2                  | 0.007    |
|                          | Ru–O  | 3.3 | 1.98     | 0.90                                        |                      |          |
| Ru/TiO <sub>2</sub> -600 | Ru–Ru | 5.3 | 2.66     | 0.53                                        | 3.4                  | 0.010    |
|                          | Ru–O  | 2.4 | 1.98     | 0.71                                        |                      |          |

290 [a] CN, the coordination number for the absorber-backscatterer pair. R, the average  
291 absorber-backscatterer distance.  $\sigma^2$ , the Debye-Waller factor.  $\Delta E_0$ , the inner potential  
292 correction. The accuracies of the above parameters were estimated as: N,  $\pm 20\%$ ; R,  
293  $\pm 1\%$ ;  $\sigma^2$ ,  $\pm 20\%$ ;  $\Delta E_0$ ,  $\pm 20\%$ . The data range used for data fitting in  $k$ -space ( $\Delta k$ ) and  
294  $R$ -space ( $\Delta R$ ) were 3.0–14.1 Å<sup>-1</sup> and 1.0–3.1 Å, respectively.

295

296

297 **Supplementary Table 5.** Quantified XPS data for surface Ti and Ru/Ti ratio on the  
 298 Ru/TiO<sub>2-x</sub> catalysts.

| Sample                   | Ti <sup>4+</sup>  |                   |                | Ti <sup>3+</sup>  |                   |                | Ru/Ti<br>ratio<br>(%) |
|--------------------------|-------------------|-------------------|----------------|-------------------|-------------------|----------------|-----------------------|
|                          | B.E. (eV)         |                   | Content<br>(%) | B.E. (eV)         |                   | Content<br>(%) |                       |
|                          | 2p <sub>1/2</sub> | 2p <sub>3/2</sub> |                | 2p <sub>1/2</sub> | 2p <sub>3/2</sub> |                |                       |
| Ru/TiO <sub>2</sub> -300 | 464.3             | 458.6             | 93.3           | 463.2             | 457.7             | 6.7            | 12.9                  |
| Ru/TiO <sub>2</sub> -450 | 464.3             | 458.5             | 90.5           | 463.3             | 457.8             | 9.5            | 11.6                  |
| Ru/TiO <sub>2</sub> -600 | 464.3             | 458.5             | 88.4           | 463.3             | 457.8             | 11.6           | 10.7                  |

299

300 **Supplementary Table 6.** TOF values calculated by CO chemisorption for the  
 301 Ru/TiO<sub>2-x</sub> catalysts.

| Sample                   | CO uptake<br>( $\mu\text{mol g}^{-1}$ ) | Ru dispersion<br>(%) | Reaction rate<br>( $\text{mol}_{\text{CO}} \text{g}_{\text{Ru}}^{-1} \text{h}^{-1}$ ) | TOF<br>( $\text{s}^{-1}$ ) |
|--------------------------|-----------------------------------------|----------------------|---------------------------------------------------------------------------------------|----------------------------|
| Ru/TiO <sub>2</sub> -200 | 102.6                                   | 47.2                 | 0.049                                                                                 | 0.003                      |
| Ru/TiO <sub>2</sub> -300 | 94.2                                    | 43.3                 | 0.043                                                                                 | 0.003                      |
| Ru/TiO <sub>2</sub> -400 | 84.7                                    | 38.9                 | 0.356                                                                                 | 0.026                      |
| Ru/TiO <sub>2</sub> -450 | 74.0                                    | 34.0                 | 0.473                                                                                 | 0.039                      |
| Ru/TiO <sub>2</sub> -500 | 59.8                                    | 27.5                 | 0.303                                                                                 | 0.031                      |
| Ru/TiO <sub>2</sub> -600 | 38.0                                    | 17.5                 | 0.134                                                                                 | 0.021                      |

302

303

304 **Supplementary Table 7.** Comparison of the catalytic behaviors of Ru-based  
 305 catalysts.

| Catalyst                                | Ru particle size (nm) | Temp. (°C) | Reaction rate (mol <sub>CO</sub> g <sub>Ru</sub> h <sup>-1</sup> ) | TOF (s <sup>-1</sup> ) | Ref.      |
|-----------------------------------------|-----------------------|------------|--------------------------------------------------------------------|------------------------|-----------|
| Ru/TiO <sub>2</sub> -450                | 1.8 ± 0.4             | 200        | 1.697                                                              | 0.140                  | This work |
|                                         |                       | 160        | 0.473                                                              | 0.039                  |           |
| Ru/TiO <sub>2</sub> (R)                 | -                     | 250        | 0.547                                                              | -                      | 4         |
| Ru/TiO <sub>2</sub> (A)                 | -                     | 250        | 0.403                                                              | -                      |           |
| Ru/TiO <sub>2</sub> (R+A)               | -                     | 250        | 0.482                                                              | -                      |           |
| Ru/Al <sub>2</sub> O <sub>3</sub>       | -                     | 250        | 0.277                                                              | -                      |           |
| Ru/Al <sub>2</sub> O <sub>3</sub> -PHR  | 2.5 ± 0.5             | 150        | 0.129                                                              | 0.006                  | 5         |
| Ru/Al <sub>2</sub> O <sub>3</sub> -10Cl | 2.2 ± 0.5             | 250        | 0.333                                                              | 0.03                   | 6         |
| 2% Ru/TiO <sub>2</sub>                  | -                     | 275        | -                                                                  | 0.390                  | 7         |
| 5% Ru/Al <sub>2</sub> O <sub>3</sub>    | -                     | 275        | -                                                                  | 0.266                  |           |
| 5% Ru/SiO <sub>2</sub>                  | -                     | 275        | -                                                                  | 0.090                  |           |
| 4% Ru/Carbolac                          | -                     | 275        | -                                                                  | 0.018                  |           |
| Ru/TiO <sub>2</sub>                     | 1.7 ± 0.2             | 230        | 0.066                                                              | -                      | 8         |
| Ru/CeO <sub>2</sub>                     | 1.6 ± 0.2             | 230        | 0.060                                                              | -                      |           |
| Ru/C                                    | 1.5 ± 0.2             | 230        | 0.077                                                              | -                      |           |
| Ru@Si/Al-10                             | 11.6                  | 270        | 0.121                                                              | -                      | 9         |
| Ru@SiAl-30                              | 13.9                  | 270        | 0.303                                                              | -                      |           |

|               |      |     |       |       |    |
|---------------|------|-----|-------|-------|----|
| Ru@SiAl-50    | 16.1 | 270 | 0.404 | -     |    |
| Ru/meso-ZSM-5 | 6.6  | 260 | 0.507 | 0.068 | 10 |
| Ru/meso-beta  | 7.2  | 260 | 0.531 | 0.071 | 11 |
| Ru/HB-S       | 2.9  | 260 | -     | 0.129 | 12 |
| Ru/CNT        | 6.3  | 260 | 0.583 | 0.193 | 13 |
| Ru@MHCS       | 3.2  | 250 | 0.342 | 0.023 | 14 |
| Ru@HCS        | 5.5  | 250 | 0.162 | 0.021 |    |

306

307

308 **Supplementary Table 8.** Catalytic performances of the Ru/Al<sub>2</sub>O<sub>3</sub>-450 catalyst.

| Reaction<br>temp. (°C) | CO conv.<br>(%) | Reaction rate<br>(mol <sub>CO</sub> g <sub>Ru</sub> <sup>-1</sup> h <sup>-1</sup> ) | Selectivity (%) |                 |                  |                 |
|------------------------|-----------------|-------------------------------------------------------------------------------------|-----------------|-----------------|------------------|-----------------|
|                        |                 |                                                                                     | CO <sub>2</sub> | CH <sub>4</sub> | C <sub>2-4</sub> | C <sub>5+</sub> |
| 160                    | 1.3             | 0.013                                                                               | 4.8             | 4.7             | 11.6             | 78.9            |
| 180                    | 3.3             | 0.032                                                                               | 29.5            | 5.4             | 9.3              | 55.8            |
| 200                    | 11.3            | 0.112                                                                               | 41.5            | 4.2             | 6.9              | 47.4            |
| 220                    | 31.3            | 0.310                                                                               | 18.7            | 4.4             | 6.5              | 70.4            |

309 Reaction conditions: 2 MPa, space velocity = 1800 mL h<sup>-1</sup> g<sub>cat</sub><sup>-1</sup>, H<sub>2</sub>/CO/Ar = 64/32/4.

310

311 **Supplementary Table 9.** Relative energy of successive reduction steps under O-rich

312 and O-poor condition.

| Reduction step                        | O-rich (eV) | O-poor (eV) |
|---------------------------------------|-------------|-------------|
| TiO <sub>4</sub> →TiO <sub>3</sub> +O | 2.66        | -2.49       |
| TiO <sub>3</sub> →TiO <sub>2</sub> +O | 2.94        | -2.21       |
| O/Ru(001)→Ru(001)+ O                  | 2.87        | -2.28       |

313

314

315 **Supplementary Notes**

316

317 **Supplementary Note 1.** As shown in Supplementary Figure 1, the XRD patterns of  
318 the Ru/TiO<sub>2-x</sub> catalysts do not show the characteristic peak for Ru<sup>0</sup>, indicating that the  
319 Ru particles were highly dispersed on the rutile TiO<sub>2</sub> with their sizes below the limit  
320 of detection.

321

322 **Supplementary Note 2.** The H<sub>2</sub>-TPR profile of the fresh Ru/TiO<sub>2</sub> catalyst displays  
323 three main peaks, ascribed to the reduction of RuO<sub>2</sub> species with different interfacial  
324 interactions with the TiO<sub>2</sub> (Supplementary Figure 6). The peaks (at 189 and 208 °C)  
325 show a higher temperatures than those in previous reports<sup>15, 16, 17</sup>, demonstrating the  
326 presence of strong interactions between the RuO<sub>2</sub> and rutile TiO<sub>2</sub> due to the lattice  
327 match of oxides. Consequently, the Ru/TiO<sub>2</sub> catalyst was stable so as to avoid particle  
328 growth during reduction. A less intense, broad peak also appears between 300 and  
329 800 °C, attributed to reduction of the TiO<sub>2</sub> support due to H spillover from the Ru to  
330 the TiO<sub>2</sub>.

331

332 **Supplementary Note 3.** The evolution of the surface metallic Ru exposure with the  
333 increase of pre-reduction temperatures was also determined by Cu upd experiments.  
334 This technique has been proven to be an effective method for quantifying the specific  
335 metal surface area, and the integral area of current for the reduction deposition of  
336 copper is proportionate to the exposed metal surface<sup>18</sup>. Supplementary Figure 7 and

337 Supplementary Table 3 show the results of Cu upd for different Ru/TiO<sub>2-x</sub> samples.  
338 Obviously, no metallic Ru was detected for the fresh Ru/TiO<sub>2</sub> sample due to the only  
339 presence of RuO<sub>2</sub> before reduction. In contrast, a great amount of metallic Ru was  
340 distinguished on the Ru/TiO<sub>2</sub>-200 sample, which was attributed to the incipient  
341 reduction of Ru/TiO<sub>2</sub> at 200 °C as confirmed by H<sub>2</sub> temperature-programmed  
342 reduction (H<sub>2</sub>-TPR) in Supplementary Figure 6. The exposure of metallic Ru reached  
343 a maximum on the Ru/TiO<sub>2</sub>-300 sample, and a remarkable decline was observed with  
344 further increasing pretreatment temperature. This can be explained by a gradual  
345 encapsulation of the Ru NPs by TiO<sub>x</sub> overlayer as increasing the reduction  
346 temperature from 300 to 600 °C, which was in good agreement with the TEM  
347 observations.

348 However, Cu upd shows a much lower dispersion than that of CO chemisorption. It  
349 might be caused by the Ru<sup>n+</sup> sites at the Ru-TiO<sub>2</sub> interface, which are unavailable for  
350 the method of Cu underpotential deposition, but it can be contained in the CO  
351 chemisorption.

352

353 **Supplementary Note 4.** As shown in Supplementary Figure 8, the edge energies of  
354 the Ru/TiO<sub>2-x</sub> catalysts are located between those of the Ru foil and RuO<sub>2</sub> standard.  
355 With increasing in the reduction temperature from 200 to 600 °C, the catalysts  
356 exhibited a shift towards lower energies closer to the Ru foil, indicative an improving  
357 degree of reduction of the Ru species with increasing reduction temperature. Despite  
358 its relatively high degree of reduction, the Ru/TiO<sub>2</sub>-600 sample was still incompletely

359 reduced due to the strong interaction between the RuO<sub>2</sub> and TiO<sub>2</sub> at the interface,  
360 which is in good agreement with the H<sub>2</sub>-TPR results.

361

362 **Supplementary Note 5.** XPS was also employed to investigate the chemical state of  
363 the TiO<sub>2</sub>. The Ti 2*p* XP spectra in Supplementary Figure 9 and Supplementary Table 5  
364 demonstrate that increasing the reduction temperature from 300 to 600 °C increased  
365 the Ti<sup>3+</sup> concentration from 6.7% to 11.6%. These data are in good agreement with the  
366 XANES results for TiO<sub>2</sub>.

367

368 **Supplementary Note 6.** The liquid and solid products (C<sub>5+</sub>) were analyzed offline  
369 using an Agilent 7890 gas chromatograph equipped with an HP-5 capillary column  
370 connected to a flame ionization detector (FID). The liquid hydrocarbons were  
371 dissolved in ethanol, while the solid wax was dissolved in dodecane. The C<sub>5+</sub> products  
372 consist of main normal paraffins and a fraction of alkenes. The relative content of  
373 each product was detected by the normalization method of peak area. As shown in  
374 Supplementary Figure 12, the carbon number distribution of liquid hydrocarbons  
375 mainly concentrates in C<sub>5</sub>–C<sub>20</sub>, while that of solid wax consists a great amount of C<sub>40</sub>–  
376 C<sub>46</sub> hydrocarbons.

377

378 **Supplementary Note 7.** The TOF values were calculated by using the Ru dispersion  
379 determined from CO chemisorption, and the results were shown in Supplementary  
380 Figure 13 and Supplementary Table 6. The variation in TOF value exhibits a



381 volcano-type trend with increasing the pretreatment temperature from 200 to 600 °C.

382

383 **Supplementary Note 8.** HAADF-STEM image of the spent Ru/TiO<sub>2</sub>-450 catalyst

384 suggests that the size of Ru can keep constant after testing (Supplementary Figure 15).

385 This was also benefited from the SMSI in the Ru/TiO<sub>2</sub>-450 catalyst, which greatly

386 prohibits the size aggregation of Ru during FTS process.

387

388

## 389 **Supplementary References**

- 390 1. Reuter K, Scheffler M. Composition, structure, and stability of RuO<sub>2</sub>(110) as a  
391 function of oxygen pressure. *Phys Rev B* **65**, 035406 (2001).
- 392 2. Lide DR. CRC Handbook of Chemistry and Physics, 88th Edition. *Taylor &*  
393 *Francis Group, Boca Raton*, (2007).
- 394 3. Lejaeghere K, *et al.* Reproducibility in density functional theory calculations  
395 of solids. *Science* **351**, aad3000 (2016).
- 396 4. Kikuchi E, Matsumoto M, Takahashi T, Machino A, Morita Y. Fischer-Tropsch  
397 synthesis over titania-supported ruthenium catalysts. *Appl Catal* **10**, 251–260  
398 (1984).
- 399 5. Lian C, Yu Y, Zhang K, Gao A, Wang Y. Highly efficient Fischer–Tropsch  
400 synthesis over an alumina-supported ruthenium catalyst. *Catal Sci Technol* **8**,  
401 1528–1534 (2018).
- 402 6. González-Carballo JM, Pérez-Alonso FJ, García-García FJ, Ojeda M, Fierro  
403 JLG, Rojas S. In-situ study of the promotional effect of chlorine on the  
404 Fischer–Tropsch synthesis with Ru/Al<sub>2</sub>O<sub>3</sub>. *J Catal* **332**, 177–186 (2015).
- 405 7. Vannice MA, Garten RL. The influence of the support on the catalytic  
406 behavior of ruthenium in CO/H<sub>2</sub> synthesis reactions. *J Catal* **63**, 255–260  
407 (1980).
- 408 8. Koh T, Koo HM, Yu T, Lim B, Bae JW. Roles of Ruthenium-support  
409 interactions of size-controlled ruthenium nanoparticles for the product  
410 distribution of Fischer-Tropsch synthesis. *ACS Catal* **4**, 1054–1060 (2014).

- 411 9. Hwang J, *et al.* Direct confinement of Ru nanoparticles inside nanochannels of  
412 large pore mesoporous aluminosilicate for Fischer–Tropsch synthesis. *J Mater*  
413 *Chem A* **3**, 23725–23731 (2015).
- 414 10. Kang J, *et al.* Mesoporous zeolite-supported ruthenium nanoparticles as highly  
415 selective Fischer-Tropsch catalysts for the production of C<sub>5</sub>–C<sub>11</sub> isoparaffins.  
416 *Angew Chem Int Ed* **50**, 5200–5203 (2011).
- 417 11. Cheng K, *et al.* Mesoporous beta zeolite-supported ruthenium nanoparticles  
418 for selective conversion of synthesis gas to C<sub>5</sub>–C<sub>11</sub> isoparaffins. *ACS Catal* **2**,  
419 441–449 (2012).
- 420 12. Sun J, *et al.* Highly-dispersed metallic Ru nanoparticles sputtered on H-beta  
421 zeolite for directly converting syngas to middle isoparaffins. *ACS Catal* **4**, 1–8  
422 (2014).
- 423 13. Kang J, Zhang S, Zhang Q, Wang Y. Ruthenium nanoparticles supported on  
424 carbon nanotubes as efficient catalysts for selective conversion of synthesis  
425 gas to diesel fuel. *Angew Chem Int Ed* **48**, 2565–2568 (2009).
- 426 14. Phaahlamohlaka TN, Kumi DO, Dlamini MW, Jewell LL, Coville NJ.  
427 Ruthenium nanoparticles encapsulated inside porous hollow carbon spheres: a  
428 novel catalyst for Fischer–Tropsch synthesis. *Catal Today* **275**, 76–83 (2016).
- 429 15. Lin Q, Liu XY, Jiang Y, Wang Y, Huang Y, Zhang T. Crystal phase effects on  
430 the structure and performance of ruthenium nanoparticles for CO<sub>2</sub>  
431 hydrogenation. *Catal Sci Technol* **4**, 2058–2063 (2014).
- 432 16. Carballo JMG, *et al.* Insights into the deactivation and reactivation of Ru/TiO<sub>2</sub>

- 433 during Fischer–Tropsch synthesis. *Catalysis Today* **214**, 2-11 (2013).
- 434 17. Omotoso T, Boonyasuwat S, Crossley SP. Understanding the Role of TiO<sub>2</sub>  
435 Crystal Structure on the Enhanced Activity and Stability of Ru/TiO<sub>2</sub> Catalysts  
436 for the Conversion of Lignin-Derived Oxygenates. *Green Chem* **16**, 645–652  
437 (2014).
- 438 18. Green CL, Kucernak A. Determination of the platinum and ruthenium surface  
439 areas in platinum-ruthenium alloy electrocatalysts by underpotential  
440 deposition of copper. I. unsupported catalysts. *J Phys Chem B* **106**, 1036–1047  
441 (2002).
- 442
